# Supplementary material for: Determining how oxygen legacy affects trajectories of soil denitrifier community structure, functional dynamics, and N2O emissions
Source: Research Square preprint supplement (doi:10.21203/rs.3.rs-3837604/v1), 2024-01-17
Supplement: Supplementary file 1 [file bfe5f46b4da4f1fdb5417eb3.xlsx]

## Sheet: Sheet1
Table S6. Taxonomic annotation of denitrification gene and transcript reads of quality-controlled reads from the 12 metagenomes and 16 metatranscriptomes. The data presents the taxonomic annotation of reads belonging to NO3- reductases (napA and narG), NO2- reductases (nirK and nirS), NO reductases (cnor and qnor), and N2O reductases (nosZ clade I and II). Reads were annotated at the phylum-level…
napA-Original	DNA	RNA	RNA	RNA	narG-Original	DNA	RNA	RNA	RNA	nirK-Original	DNA	RNA	RNA	RNA	nirS-Original	DNA	RNA	RNA	RNA	cnor-Original	DNA	RNA	RNA	RNA	qnor-Original	DNA	RNA	RNA	RNA	nosZ clade I-Original	DNA	RNA	RNA	RNA	nosZ clade II-Original	DNA	RNA	RNA	RNA
phylum		0.25 h	1.0 h	2.0 h	phylum		0.25 h	1.0 h	2.0 h	phylum		0.25 h	1.0 h	2.0 h	phylum		0.25 h	1.0 h	2.0 h	phylum		0.25 h	1.0 h	2.0 h	phylum		0.25 h	1.0 h	2.0 h	phylum		0.25 h	1.0 h	2.0 h	phylum		0.25 h	1.0 h	2.0 h
Acidobacteria	30	0	0	0	Acidobacteria	24	0	0	0	Acidobacteria	182	0	0	0	Acidobacteria	10	0	0	0	Acidobacteria	7	0	0	0	Acidobacteria	83	0	0	0	Acidobacteria	2	0	0	0	Acidobacteria	8	0	0	0
Actinobacteria	73	0	0	0	Actinobacteria	891	0	0	0	Actinobacteria	71	0	0	0	Actinobacteria	7	0	0	0	Actinobacteria	0	0	0	0	Actinobacteria	133	0	0	0	Actinobacteria	0	0	0	0	Actinobacteria	5	0	0	0
Alphaproteobacteria	284	0	0	0	Alphaproteobacteria	157	0	0	0	Alphaproteobacteria	4	0	0	0	Alphaproteobacteria	0	0	0	0	Alphaproteobacteria	15	0	0	0	Alphaproteobacteria	82	0	0	0	Alphaproteobacteria	70	0	0	0	Alphaproteobacteria	0	0	0	0
Aquificae	0	0	0	0	Aquificae	0	0	0	0	Aquificae	0	0	0	0	Aquificae	0	0	0	0	Aquificae	0	0	0	0	Aquificae	0	0	0	0	Aquificae	0	0	0	0	Aquificae	1	0	0	0
Assigned to phylum <0.5% of all reads	15	0	0	0	Assigned to phylum <0.5% of all reads	19	0	0	0	Assigned to phylum <0.5% of all reads	56	0	0	0	Assigned to phylum<0.5% of all reads	0	0	0	0	Assigned to phylum <0.5% of all reads	0	0	0	0	Assigned to phylum <0.5% of all reads	14	0	0	0	Assigned to phylum <0.5% of all reads	0	0	0	0	Assigned to phylum <0.5% of all reads	0	0	0	0
Bacteroidetes	6	0	0	0	Bacteroidetes	0	0	0	0	Bacteroidetes	83	0	0	0	Bacteroidetes	3	0	0	0	Bacteroidetes	0	0	0	0	Bacteroidetes	333	0	0	0	Bacteroidetes	0	0	0	0	Bacteroidetes	30	0	0	0
Betaproteobacteria	75	0	0	0	Betaproteobacteria	88	0	0	0	Betaproteobacteria	10	0	0	0	Betaproteobacteria	0	0	0	0	Betaproteobacteria	11	0	0	0	Betaproteobacteria	52	0	0	0	Betaproteobacteria	10	0	0	0	Betaproteobacteria	1	0	0	0
Calditrichaeota	0	0	0	0	Calditrichaeota	0	0	0	0	Calditrichaeota	7	0	0	0	Calditrichaeota	0	0	0	0	Calditrichaeota	0	0	0	0	Calditrichaeota	0	0	0	0	Calditrichaeota	0	0	0	0	Calditrichaeota	4	0	0	0
Cand div Zixibacteria	0	0	0	0	Cand div Zixibacteria	0	0	0	0	Cand div Zixibacteria	0	0	0	0	Cand div Zixibacteria	0	0	0	0	Cand div Zixibacteria	0	0	0	0	Cand div Zixibacteria	0	0	0	0	Cand div Zixibacteria	0	0	0	0	Cand div Zixibacteria	0	0	0	0
Candidatus Hydrogenedentes	0	0	0	0	Candidatus Hydrogenedentes	0	0	0	0	Candidatus Hydrogenedentes	0	0	0	0	Candidatus Hydrogenedentes	0	0	0	0	Candidatus Hydrogenedentes	0	0	0	0	Candidatus Hydrogenedentes	0	0	0	0	Candidatus Hydrogenedentes	0	0	0	0	Candidatus Hydrogenedentes	0	0	0	0
Candidatus Mlainabacteria	0	0	0	0	Candidatus Mlainabacteria	0	0	0	0	Candidatus Mlainabacteria	0	0	0	0	Candidatus Mlainabacteria	0	0	0	0	Candidatus Mlainabacteria	0	0	0	0	Candidatus Mlainabacteria	0	0	0	0	Candidatus Mlainabacteria	0	0	0	0	Candidatus Mlainabacteria	0	0	0	0
Candidatus Rokubacteria	0	0	0	0	Candidatus Rokubacteria	0	0	0	0	Candidatus Rokubacteria	0	0	0	0	Candidatus Rokubacteria	0	0	0	0	Candidatus Rokubacteria	0	0	0	0	Candidatus Rokubacteria	0	0	0	0	Candidatus Rokubacteria	0	0	0	0	Candidatus Rokubacteria	0	0	0	0
Chlamydiae	0	0	0	0	Chlamydiae	0	0	0	0	Chlamydiae	7	0	0	0	Chlamydiae	0	0	0	0	Chlamydiae	0	0	0	0	Chlamydiae	0	0	0	0	Chlamydiae	0	0	0	0	Chlamydiae	0	0	0	0
Chloroflexi	8	0	0	0	Chloroflexi	10	0	0	0	Chloroflexi	0	0	0	0	Chloroflexi	0	0	0	0	Chloroflexi	0	0	0	0	Chloroflexi	9	0	0	0	Chloroflexi	0	0	0	0	Chloroflexi	2	0	0	0
Cyanobacteria	0	0	0	0	Cyanobacteria	0	0	0	0	Cyanobacteria	20	0	0	0	Cyanobacteria	0	0	0	0	Cyanobacteria	0	0	0	0	Cyanobacteria	0	0	0	0	Cyanobacteria	0	0	0	0	Cyanobacteria	0	0	0	0
Deferribacteres	0	0	0	0	Deferribacteres	0	0	0	0	Deferribacteres	0	0	0	0	Deferribacteres	0	0	0	0	Deferribacteres	0	0	0	0	Deferribacteres	0	0	0	0	Deferribacteres	0	0	0	0	Deferribacteres	0	0	0	0
Deinococcus-Thermus	0	0	0	0	Deinococcus-Thermus	0	0	0	0	Deinococcus-Thermus	0	0	0	0	Deinococcus-Thermus	0	0	0	0	Deinococcus-Thermus	0	0	0	0	Deinococcus-Thermus	0	0	0	0	Deinococcus-Thermus	0	0	0	0	Deinococcus-Thermus	0	0	0	0
Deltaproteobacteria	18	0	0	0	Deltaproteobacteria	19	0	0	0	Deltaproteobacteria	0	0	0	0	Deltaproteobacteria	0	0	0	0	Deltaproteobacteria	3	0	0	0	Deltaproteobacteria	36	0	0	0	Deltaproteobacteria	0	0	0	0	Deltaproteobacteria	9	0	0	0
Elusimicrobia	0	0	0	0	Elusimicrobia	0	0	0	0	Elusimicrobia	0	0	0	0	Elusimicrobia	0	0	0	0	Elusimicrobia	0	0	0	0	Elusimicrobia	0	0	0	0	Elusimicrobia	0	0	0	0	Elusimicrobia	0	0	0	0
Epsilonproteobacteria	0	0	0	0	Epsilonproteobacteria	0	0	0	0	Epsilonproteobacteria	51	0	0	0	Epsilonproteobacteria	0	0	0	0	Epsilonproteobacteria	0	0	0	0	Epsilonproteobacteria	0	0	0	0	Epsilonproteobacteria	0	0	0	0	Epsilonproteobacteria	1	0	0	0
Firmicutes	0	0	0	0	Firmicutes	17	0	0	0	Firmicutes	17	0	0	0	Firmicutes	0	0	0	0	Firmicutes	0	0	0	0	Firmicutes	5	0	0	0	Firmicutes	1	0	0	0	Firmicutes	1	0	0	0
Gammaproteobacteria	46	0	0	0	Gammaproteobacteria	26	0	0	0	Gammaproteobacteria	0	0	0	0	Gammaproteobacteria	0	0	0	0	Gammaproteobacteria	8	0	0	0	Gammaproteobacteria	80	0	0	0	Gammaproteobacteria	2	0	0	0	Gammaproteobacteria	0	0	0	0
Gemmatimonadetes	5	0	0	0	Gemmatimonadetes	0	0	0	0	Gemmatimonadetes	13	0	0	0	Gemmatimonadetes	0	0	0	0	Gemmatimonadetes	0	0	0	0	Gemmatimonadetes	0	0	0	0	Gemmatimonadetes	1	0	0	0	Gemmatimonadetes	6	0	0	0
Hydrogenophilalia	0	0	0	0	Hydrogenophilalia	0	0	0	0	Epsilonproteobacteria	0	0	0	0	Hydrogenophilalia	0	0	0	0	Hydrogenophilalia	0	0	0	0	Hydrogenophilalia	0	0	0	0	Hydrogenophilalia	0	0	0	0	Hydrogenophilalia	0	0	0	0
Ignavibacteriae	0	0	0	0	Ignavibacteriae	0	0	0	0	Ignavibacteriae	8	0	0	0	Ignavibacteriae	0	0	0	0	Ignavibacteriae	0	0	0	0	Ignavibacteriae	0	0	0	0	Ignavibacteriae	0	0	0	0	Ignavibacteriae	1	0	0	0
Nitrospirae	0	0	0	0	Nitrospirae	19	0	0	0	Nitrospirae	0	0	0	0	Nitrospirae	0	0	0	0	Nitrospirae	0	0	0	0	Nitrospirae	0	0	0	0	Nitrospirae	0	0	0	0	Nitrospirae	0	0	0	0
Planctomycetes	13	0	0	0	Planctomycetes	12	0	0	0	Planctomycetes	0	0	0	0	Planctomycetes	0	0	0	0	Planctomycetes	0	0	0	0	Planctomycetes	33	0	0	0	Planctomycetes	0	0	0	0	Planctomycetes	2	0	0	0
Spirochaetes	0	0	0	0	Spirochaetes	0	0	0	0	Spirochaetes	0	0	0	0	Spirochaetes	0	0	0	0	Spirochaetes	0	0	0	0	Spirochaetes	0	0	0	0	Spirochaetes	0	0	0	0	Spirochaetes	0	0	0	0
Unclassified	53	0	0	0	Unclassified	240	0	0	0	Unclassified	10	0	0	0	Unclassified	0	0	0	0	Unclassified	7	0	0	0	Unclassified	62	0	0	0	Unclassified	6	0	0	0	Unclassified	105	0	0	0
Verrucomicrobia	4	0	0	0	Verrucomicrobia	0	0	0	0	Verrucomicrobia	156	0	0	0	Verrucomicrobia	0	0	0	0	Verrucomicrobia	3	0	0	0	Verrucomicrobia	1	0	0	0	Verrucomicrobia	0	0	0	0	Verrucomicrobia	19	0	0	0
napA-Oxic	DNA	RNA	RNA	RNA	narG-Oxic	DNA	RNA	RNA	RNA	nirK-Oxic	DNA	RNA	RNA	RNA	nirS-Oxic	DNA	RNA	RNA	RNA	cnor-Oxic	DNA	RNA	RNA	RNA	qnor-Oxic	DNA	RNA	RNA	RNA	nosZ clade I-Oxic	DNA	RNA	RNA	RNA	nosZ clade II-Oxic	DNA	RNA	RNA	RNA
phylum	0	T1	T2	T3	phylum		0.25 h	1.0 h	2.0 h	phylum		0.25 h	1.0 h	2.0 h	phylum		0.25 h	1.0 h	2.0 h	phylum		0.25 h	1.0 h	2.0 h	phylum		0.25 h	1.0 h	2.0 h	phylum		0.25 h	1.0 h	2.0 h	phylum		0.25 h	1.0 h	2.0 h
Acidobacteria	25	1	3	0	Acidobacteria	23	0	0	0	Acidobacteria	8	0	0	0	Acidobacteria	0	0	0	0	Acidobacteria	9	0	0	0	Acidobacteria	63	5	25	66	Acidobacteria	1	0	0	2	Acidobacteria	5	0	0	7
Actinobacteria	82	5	4	2	Actinobacteria	1049	216	241	241	Actinobacteria	69	15	23	79	Actinobacteria	0	0	0	0	Actinobacteria	0	0	0	0	Actinobacteria	85	14	25	42	Actinobacteria	0	0	0	0	Actinobacteria	1	0	0	0
Alphaproteobacteria	376	34	32	40	Alphaproteobacteria	146	38	52	52	Alphaproteobacteria	167	99	166	253	Alphaproteobacteria	6	0	3	2	Alphaproteobacteria	11	9	13	9	Alphaproteobacteria	109	30	35	34	Alphaproteobacteria	71	11	32	57	Alphaproteobacteria	1	14	12	33
Aquificae	0	0	0	0	Aquificae	0	0	0	0	Aquificae	0	0	0	0	Aquificae	0	0	0	0	Aquificae	1	0	0	0	Aquificae	0	0	0	0	Aquificae	0	0	0	0	Aquificae	1	2	22	49
Assigned to phylum <0.5% of all reads	13	0	0	0	Assigned to phylum <0.5% of all reads	21	4	4	4	Assigned to phylum <0.5% of all reads	11	13	10	40	Assigned to phylum <0.5% of all reads	0	0	0	0	Assigned to phylum <0.5% of all reads	0	0	0	0	Assigned to phylum <0.5% of all reads	13	3	3	0	Assigned to phylum <0.5% of all reads	0	0	1	1	Assigned to phylum <0.5% of all reads	0	1	4	7
Bacteroidetes	12	11	5	7	Bacteroidetes	0	0	0	0	Bacteroidetes	19	21	19	43	Bacteroidetes	0	0	0	0	Bacteroidetes	1	14	5	34	Bacteroidetes	14	15	36	0	Bacteroidetes	0	0	0	0	Bacteroidetes	32	113	343	652
Betaproteobacteria	152	21	19	24	Betaproteobacteria	151	66	92	92	Betaproteobacteria	115	134	154	180	Betaproteobacteria	13	14	27	28	Betaproteobacteria	8	10	10	14	Betaproteobacteria	152	157	270	330	Betaproteobacteria	24	35	39	40	Betaproteobacteria	0	17	11	17
Calditrichaeota	0	0	0	0	Calditrichaeota	0	0	0	0	Calditrichaeota	0	0	0	0	Calditrichaeota	0	0	0	0	Calditrichaeota	0	0	0	0	Calditrichaeota	0	0	0	0	Calditrichaeota	0	0	0	0	Calditrichaeota	0	0	0	0
Cand div Zixibacteria	0	0	0	0	Cand div Zixibacteria	0	0	0	0	Cand div Zixibacteria	0	0	0	0	Cand div Zixibacteria	0	0	0	0	Cand div Zixibacteria	0	0	0	0	Cand div Zixibacteria	0	0	0	0	Cand div Zixibacteria	0	0	0	0	Cand div Zixibacteria	0	0	0	0
Candidatus Hydrogenedentes	0	0	0	0	Candidatus Hydrogenedentes	0	0	0	0	Candidatus Hydrogenedentes	0	0	0	0	Candidatus Hydrogenedentes	0	0	0	0	Candidatus Hydrogenedentes	0	0	0	0	Candidatus Hydrogenedentes	0	0	0	0	Candidatus Hydrogenedentes	0	0	0	0	Candidatus Hydrogenedentes	0	0	0	0
Candidatus Mlainabacteria	0	0	0	0	Candidatus Mlainabacteria	0	0	0	0	Candidatus Mlainabacteria	0	0	0	0	Candidatus Mlainabacteria	0	0	0	0	Candidatus Mlainabacteria	0	0	0	0	Candidatus Mlainabacteria	0	0	0	0	Candidatus Mlainabacteria	0	0	0	0	Candidatus Mlainabacteria	0	0	0	0
Candidatus Rokubacteria	0	0	0	0	Candidatus Rokubacteria	0	0	0	0	Candidatus Rokubacteria	8	0	0	0	Candidatus Rokubacteria	0	0	0	0	Candidatus Rokubacteria	0	0	0	0	Candidatus Rokubacteria	0	0	0	0	Candidatus Rokubacteria	0	0	0	0	Candidatus Rokubacteria	0	0	0	0
Chlamydiae	0	0	0	0	Chlamydiae	0	0	0	0	Chlamydiae	0	0	0	0	Chlamydiae	0	0	0	0	Chlamydiae	0	0	0	0	Chlamydiae	0	0	0	0	Chlamydiae	0	0	0	0	Chlamydiae	0	0	0	0
Chloroflexi	10	0	0	0	Chloroflexi	10	0	0	0	Chloroflexi	37	6	29	99	Chloroflexi	0	0	0	0	Chloroflexi	0	0	0	0	Chloroflexi	7	0	0	0	Chloroflexi	0	1	0	0	Chloroflexi	2	13	37	62
Cyanobacteria	0	0	0	0	Cyanobacteria	0	0	0	0	Cyanobacteria	0	0	0	0	Cyanobacteria	0	0	0	0	Cyanobacteria	0	0	0	0	Cyanobacteria	0	0	0	0	Cyanobacteria	0	0	0	0	Cyanobacteria	0	0	0	0
Deferibacteres	0	0	0	0	Deferibacteres	0	0	0	0	Deferibacteres	0	0	0	0	Deferibacteres	0	0	0	0	Deferibacteres	0	0	0	0	Deferibacteres	0	0	0	0	Deferibacteres	0	0	0	0	Deferibacteres	0	0	0	0
Deinococcus-Thermus	0	0	0	0	Deinococcus-Thermus	0	0	0	0	Deinococcus-Thermus	0	0	0	0	Deinococcus-Thermus	0	0	0	0	Deinococcus-Thermus	1	0	0	0	Deinococcus-Thermus	0	0	0	0	Deinococcus-Thermus	0	0	0	0	Deinococcus-Thermus	0	0	0	0
Deltaproteobacteria	13	0	2	2	Deltaproteobacteria	14	0	0	0	Deltaproteobacteria	8	5	6	11	Deltaproteobacteria	0	0	0	0	Deltaproteobacteria	4	0	0	0	Deltaproteobacteria	35	11	24	49	Deltaproteobacteria	1	0	0	37	Deltaproteobacteria	9	1	7	15
Elusimicrobia	0	0	0	0	Elusimicrobia	0	0	0	0	Elusimicrobia	0	0	0	0	Elusimicrobia	0	0	0	0	Elusimicrobia	0	0	0	0	Elusimicrobia	0	0	0	0	Elusimicrobia	0	0	0	0	Elusimicrobia	0	0	0	0
Epsilonproteobacteria	0	0	0	0	Epsilonproteobacteria	0	0	0	0	Epsilonproteobacteria	0	0	0	0	Epsilonproteobacteria	0	0	0	0	Epsilonproteobacteria	0	0	0	0	Epsilonproteobacteria	0	0	0	0	Epsilonproteobacteria	0	0	0	0	Epsilonproteobacteria	1	8	19	38
Firmicutes	0	1	0	1	Firmicutes	16	0	0	0	Firmicutes	7	0	16	0	Firmicutes	0	0	0	0	Firmicutes	1	0	0	0	Firmicutes	6	0	0	10	Firmicutes	1	0	0	0	Firmicutes	0	1	6	15
Gammaproteobacteria	49	19	32	13	Gammaproteobacteria	56	166	348	348	Gammaproteobacteria	89	317	448	463	Gammaproteobacteria	5	1	4	6	Gammaproteobacteria	10	3	5	7	Gammaproteobacteria	133	224	375	355	Gammaproteobacteria	5	4	36	0	Gammaproteobacteria	0	3	4	8
Gemmatimonadetes	6	0	0	0	Gemmatimonadetes	0	0	0	0	Gemmatimonadetes	8	9	13	22	Gemmatimonadetes	0	0	0	0	Gemmatimonadetes	1	0	0	0	Gemmatimonadetes	0	0	0	0	Gemmatimonadetes	1	0	0	0	Gemmatimonadetes	5	9	55	130
Hydrogenophilalia	0	0	0	0	Hydrogenophilalia	0	0	0	0	Hydrogenophilalia	0	0	0	0	Hydrogenophilalia	1	0	0	0	Hydrogenophilalia	0	0	0	0	Hydrogenophilalia	0	0	0	0	Hydrogenophilalia	0	0	0	0	Hydrogenophilalia	0	0	0	0
Ignavibacteriae	0	0	0	0	Ignavibacteriae	0	0	0	0	Ignavibacteriae	0	0	0	0	Ignavibacteriae	0	0	0	0	Ignavibacteriae	0	0	0	0	Ignavibacteriae	0	0	0	0	Ignavibacteriae	0	0	0	0	Ignavibacteriae	4	4	21	43
Nitrospirae	0	0	0	0	Nitrospirae	17	104	123	123	Nitrospirae	4	0	0	0	Nitrospirae	1	0	0	0	Nitrospirae	0	0	0	0	Nitrospirae	0	0	0	0	Nitrospirae	0	0	0	0	Nitrospirae	0	0	0	0
Planctomycetes	11	0	1	1	Planctomycetes	0	0	0	0	Planctomycetes	0	0	0	0	Planctomycetes	0	0	0	0	Planctomycetes	0	0	0	0	Planctomycetes	26	18	29	61	Planctomycetes	0	0	0	0	Planctomycetes	1	1	5	12
Spirochaetes	0	0	0	0	Spirochaetes	0	0	0	0	Spirochaetes	0	0	0	0	Spirochaetes	0	0	0	0	Spirochaetes	1	1	3	2	Spirochaetes	0	0	0	0	Spirochaetes	0	0	0	0	Spirochaetes	0	0	0	0
Unclassified	51	4	6	0	Unclassified	288	17	17	17	Unclassified	166	160	244	316	Unclassified	0	0	1	1	Unclassified	14	2	2	5	Unclassified	99	88	166	221	Unclassified	5	5	9	14	Unclassified	84	22	75	148
Verrucomicrobia	6	0	0	1	Verrucomicrobia	0	0	0	0	Verrucomicrobia	19	15	16	35	Verrucomicrobia	0	0	0	0	Verrucomicrobia	3	0	0	0	Verrucomicrobia	0	0	0	0	Verrucomicrobia	1	0	0	2	Verrucomicrobia	10	1	13	31
napA-SA	DNA	RNA	RNA	RNA	narG-SA	DNA	RNA	RNA	RNA	nirK-SA	DNA	RNA	RNA	RNA	nirS-SA	DNA	RNA	RNA	RNA	cnor-SA	DNA	RNA	RNA	RNA	qnor-SA	DNA	RNA	RNA	RNA	nosZ clade I-SA	DNA	RNA	RNA	RNA	nosZ clade II-SA	DNA	RNA	RNA	RNA
phylum		0.25 h	1.0 h	2.0 h	phylum		0.25 h	1.0 h	2.0 h	phylum		0.25 h	1.0 h	2.0 h	phylum		0.25 h	1.0 h	2.0 h	phylum		0.25 h	1.0 h	2.0 h	phylum		0.25 h	1.0 h	2.0 h	phylum		0.25 h	1.0 h	2.0 h	phylum		0.25 h	1.0 h	2.0 h
Acidobacteria	18	0	1	0	Acidobacteria	23	0	0	0	Acidobacteria	6	0	0	0	Acidobacteria	0	0	0	0	Acidobacteria	4	0	0	0	Acidobacteria	42	4	4	8	Acidobacteria	1	0	0	0	Acidobacteria	4	0	0	0
Actinobacteria	82	2	1	7	Actinobacteria	1374	259	565	1002	Actinobacteria	108	12	33	70	Actinobacteria	0	0	0	0	Actinobacteria	1	0	0	0	Actinobacteria	85	11	8	19	Actinobacteria	0	0	0	0	Actinobacteria	1	0	0	0
Alphaproteobacteria	209	18	13	28	Alphaproteobacteria	106	25	14	38	Alphaproteobacteria	121	30	47	204	Alphaproteobacteria	7	0	0	3	Alphaproteobacteria	7	1	5	10	Alphaproteobacteria	66	9	10	19	Alphaproteobacteria	47	17	17	47	Alphaproteobacteria	1	2	1	5
Aquificae	0	0	0	0	Aquificae	0	0	0	0	Aquificae	0	0	0	0	Aquificae	0	0	0	0	Aquificae	0	0	0	0	Aquificae	0	0	0	0	Aquificae	0	0	0	0	Aquificae	1	2	2	13
Assigned to phylum <0.5% of all reads	9	0	0	1	Assigned to phylum <0.5% of all reads	33	2	1	3.5	Assigned to phylum <0.5% of all reads	0	2	3	10	Assigned to phylum <0.5% of all reads	0	0	0	0	Assigned to phylum <0.5% of all reads	0	0	0	0	Assigned to phylum <0.5% of all reads	7	0	0	1	Assigned to phylum <0.5% of all reads	0	0	0	0	Assigned to phylum <0.5% of all reads	0	0	0	1
Bacteroidetes	8	1	0	1	Bacteroidetes	0	0	0	0	Bacteroidetes	6	6	5	15	Bacteroidetes	0	0	0	0	Bacteroidetes	1	1	1	1	Bacteroidetes	8	3	2	12	Bacteroidetes	1	0	0	0	Bacteroidetes	17	67	51	184
Betaproteobacteria	87	5	8	14	Betaproteobacteria	90	36	25	114	Betaproteobacteria	70	11	15	61	Betaproteobacteria	11	3	5	15	Betaproteobacteria	12	4	2	16	Betaproteobacteria	93	31	19	135	Betaproteobacteria	12	14	14	42	Betaproteobacteria	1	1	1	6
Calditrichaeota	2	0	0	0	Calditrichaeota	0	0	0	0	Calditrichaeota	0	0	0	0	Calditrichaeota	0	0	0	0	Calditrichaeota	0	0	0	0	Calditrichaeota	0	0	0	0	Calditrichaeota	0	0	0	0	Calditrichaeota	0	0	0	0
Cand div Zixibacteria	0	0	0	0	Cand div Zixibacteria	0	0	0	0	Cand div Zixibacteria	0	0	0	0	Cand div Zixibacteria	0	0	0	0	Cand div Zixibacteria	0	0	0	0	Cand div Zixibacteria	4	0	0	0	Cand div Zixibacteria	0	0	0	0	cand div Zixibacteria	0	0	0	0
Candidatus Hydrogenedentes	0	0	0	0	Candidatus Hydrogenedentes	0	0	0	0	Candidatus Hydrogenedentes	0	0	0	0	Candidatus Hydrogenedentes	0	0	0	0	Candidatus Hydrogenedentes	0	0	0	0	Candidatus Hydrogenedentes	2	0	0	0	Candidatus Hydrogenedentes	0	0	0	0	Candidatus Hydrogenedentes	0	0	0	0
Candidatus Mlainabacteria	0	0	0	0	Candidatus Mlainabacteria	0	0	0	0	Candidatus Mlainabacteria	0	0	0	0	Candidatus Mlainabacteria	0	0	0	0	Candidatus Mlainabacteria	0	0	0	0	Candidatus Mlainabacteria	3	0	0	0	Candidatus Mlainabacteria	0	0	0	0	Candidatus Mlainabacteria	0	0	0	0
Candidatus Rokubacteria	0	0	0	0	Candidatus Rokubacteria	0	0	0	0	Candidatus Rokubacteria	9	0	0	0	Candidatus Rokubacteria	0	0	0	0	Candidatus Rokubacteria	0	0	0	0	Candidatus Rokubacteria	0	0	0	0	Candidatus Rokubacteria	0	0	0	0	Candidatus Rokubacteria	0	0	0	0
Chlamydiae	0	0	0	0	Chlamydiae	0	0	0	0	Chlamydiae	0	0	0	0	Chlamydiae	0	0	0	0	Chlamydiae	0	0	0	0	Chlamydiae	0	0	0	0	Chlamydiae	0	0	0	0	Chlamydiae	0	0	0	0
Chloroflexi	3	0	0	1	Chloroflexi	0	0	0	0	Chloroflexi	36	11	0	50	Chloroflexi	0	0	0	0	Chloroflexi	1	0	0	0	Chloroflexi	4	0	0	0	Chloroflexi	0	0	0	0	Chloroflexi	0	10	3	15
Cyanobacteria	0	0	0	0	Cyanobacteria	0	0	0	0	Cyanobacteria	0	0	0	0	Cyanobacteria	0	0	0	0	Cyanobacteria	0	0	0	0	Cyanobacteria	0	0	0	0	Cyanobacteria	0	0	0	0	Cyanobacteria	0	0	0	0
Deferibacteres	0	0	0	0	Deferibacteres	0	0	0	0	Deferibacteres	0	0	0	0	Deferibacteres	0	0	0	0	Deferibacteres	0	0	0	0	Deferibacteres	0	0	0	0	Deferibacteres	0	0	0	0	Deferibacteres	0	0	0	0
Deinococcus-Thermus	0	0	0	0	Deinococcus-Thermus	0	0	0	0	Deinococcus-Thermus	0	0	0	0	Deinococcus-Thermus	0	0	0	0	Deinococcus-Thermus	1	0	0	0	Deinococcus-Thermus	0	0	0	0	Deinococcus-Thermus	0	0	0	0	Deinococcus-Thermus	0	0	0	0
Deltaproteobacteria	11	0	0	0	Deltaproteobacteria	7	0	0	0	Deltaproteobacteria	4	2	0	0	Deltaproteobacteria	0	0	0	0	Deltaproteobacteria	2	0	0	0	Deltaproteobacteria	25	4	4	17	Deltaproteobacteria	0	0	0	0	Deltaproteobacteria	5	2	0	1
Elusimicrobia	0	0	0	0	Elusimicrobia	0	0	0	0	Elusimicrobia	0	0	0	0	Elusimicrobia	0	0	0	0	Elusimicrobia	0	0	0	0	Elusimicrobia	2	0	0	0	Elusimicrobia	0	0	0	0	Elusimicrobia	0	0	0	0
Epsilonproteobacteria	0	0	0	0	Epsilonproteobacteria	0	0	0	0	Epsilonproteobacteria	0	0	0	0	Epsilonproteobacteria	0	0	0	0	Epsilonproteobacteria	0	0	0	0	Epsilonproteobacteria	0	0	0	0	Epsilonproteobacteria	0	0	0	0	Epsilonproteobacteria	1	4	3	11
Firmicutes	5	0	0	0	Firmicutes	16	0	0	0	Firmicutes	4	2	0	10	Firmicutes	0	0	0	0	Firmicutes	0	0	0	0	Firmicutes	5	0	0	0	Firmicutes	0	0	0	0	Firmicutes	1	1	0	2
Gammaproteobacteria	46	96	60	53	Gammaproteobacteria	58	624	845	510	Gammaproteobacteria	59	123	95	299	Gammaproteobacteria	2	1	1	3	Gammaproteobacteria	6	5	2	8	Gammaproteobacteria	81	99	76	237	Gammaproteobacteria	4	1	5	22	Gammaproteobacteria	1	0	0	0
Gemmatimonadetes	4	0	0	0	Gemmatimonadetes	0	0	0	0	Gemmatimonadetes	9	2	4	8	Gemmatimonadetes	0	0	0	0	Gemmatimonadetes	1	0	0	0	Gemmatimonadetes	0	0	0	0	Gemmatimonadetes	1	0	0	0	Gemmatimonadetes	4	4	6	21
Hydrogenophilalia		0	0	0	Hydrogenophilalia	0	0	0	0	Hydrogenophilalia	0	0	0	0	Hydrogenophilalia	1	0	0	0	Hydrogenophilalia	0	0	0	0	Hydrogenophilalia	0	0	0	0	Hydrogenophilalia	0	0	0	0	Hydrogenophilalia	0	0	0	0
Ignavibacteriae	0	0	0	0	Ignavibacteriae	0	0	0	0	Ignavibacteriae	0	0	0	0	Ignavibacteriae	0	0	0	0	Ignavibacteriae	0	0	0	0	Ignavibacteriae	3	0	0	0	Ignavibacteriae	0	0	0	0	Ignavibacteriae	0	4	3	17
Nitrospirae	0	0	0	0	Nitrospirae	0	64	76	113	Nitrospirae	4	0	0	0	Nitrospirae	0	0	0	0	Nitrospirae	0	0	0	0	Nitrospirae	0	0	0	0	Nitrospirae	0	0	0	0	Nitrospirae	0	0	0	0
Planctomycetes	9	0	0	0	Planctomycetes	0	0	0	0	Planctomycetes	0	0	0	0	Planctomycetes	0	0	0	0	Planctomycetes	0	0	0	0	Planctomycetes	16	4	2	9	Planctomycetes	0	0	0	0	Planctomycetes	1	1	1	3
Spirochaetes	0	0	0	0	Spirochaetes	0	0	0	0	Spirochaetes	0	0	0	0	Spirochaetes	0	0	0	0	Spirochaetes	0	1	0	1	Spirochaetes	0	0	0	0	Spirochaetes	0	0	0	0	Spirochaetes	0	1	0	0
Unclassified	42	1	2	2	Unclassified	310	11	2	28	Unclassified	0	61	85	238	Unclassified	0	0	0	0	Unclassified	12	1	0	1	Unclassified	74	22	27	86	Unclassified	5	0	2	9	Unclassified	55	6	8	41
Verrucomicrobia	2	0	0	0	Verrucomicrobia	0	0	0	0	Verrucomicrobia	12	6	0	10	Verrucomicrobia	0	0	0	0	Verrucomicrobia	2	0	0	0	Verrucomicrobia	3	0	0	0	Verrucomicrobia	0	0	0	0	Verrucomicrobia	6	0	0	3
napA-LA	DNA	RNA	RNA	RNA	narG-LA	DNA	RNA	RNA	RNA	nirK-LA	DNA	RNA	RNA	RNA	nirS-LA	DNA	RNA	RNA	RNA	cnor-LA	DNA	RNA	RNA	RNA	qnor-LA	DNA	RNA	RNA	RNA	nosZ clade I-LA	DNA	RNA	RNA	RNA	nosZ clade II-LA	DNA	RNA	RNA	RNA
phylum		0.25 h	1.0 h	2.0 h	phylum		0.25 h	1.0 h	2.0 h	phylum		0.25 h	1.0 h	2.0 h	phylum		0.25 h	1.0 h	2.0 h	phylum		0.25 h	1.0 h	2.0 h	phylum		0.25 h	1.0 h	2.0 h	phylum		0.25 h	1.0 h	2.0 h	phylum		0.25 h	1.0 h	2.0 h
Acidobacteria	34	2	6	0	Acidobacteria	27	0	0	0	Acidobacteria	9	0	0	0	Acidobacteria	0	0	0	0	Acidobacteria	7	0	0	0	Acidobacteria	92	5	0	7	Acidobacteria	1	0	0	0	Acidobacteria	4	0	0	0
Actinobacteria	85	11	14	4	Actinobacteria	1605	694	1233	802	Actinobacteria	130	41	64	53	Actinobacteria	0	0	0	0	Actinobacteria	0	0	0	0	Actinobacteria	110	28	37	22	Actinobacteria	0	0	0	0	Actinobacteria	3	0	0	0
Alphaproteobacteria	297	52	51	68	Alphaproteobacteria	151	72	74	205	Alphaproteobacteria	184	138	167	438	Alphaproteobacteria	7	3	6	7	Alphaproteobacteria	19	26	27	60	Alphaproteobacteria	97	31	31	20	Alphaproteobacteria	77	50	79	108	Alphaproteobacteria	0	5	10	3
Aquificae	0	0	0	0	Aquificae	0	0	0	0	Aquificae	0	0	0	0	Aquificae	0	0	0	0	Aquificae	0	0	0	0	Aquificae	0	0	0	0	Aquificae	0	0	0	0	Aquificae	2	6	11	4
Assigned to phylum <0.5% of all reads	11	2	6	2	Assigned to phylum <0.5% of all reads	30	8	17	6	Assigned to phylum <0.5% of all reads	0	6	10	14	Assigned to phylum <0.5% of all reads	0	0	0	0	Assigned to phylum <0.5% of all reads	0	0	1	1	Assigned to phylum <0.5% of all reads	19	1	1	0	Assigned to phylum <0.5% of all reads	0	0	2.5	0.5	Assigned to phylum <0.5% of all reads	0	3	3	2
Bacteroidetes	10	3	4	5	Bacteroidetes	0	0	0	0	Bacteroidetes	10	12	12	8	Bacteroidetes	0	0	0	0	Bacteroidetes	1	3	1	0	Bacteroidetes	12	7	15	7	Bacteroidetes	1	0	0	0	Bacteroidetes	35	106	167	66
Betaproteobacteria	95	33	49	38	Betaproteobacteria	106	403	345	258	Betaproteobacteria	83	64	82	63	Betaproteobacteria	17	97	124	72	Betaproteobacteria	14	74	77	57	Betaproteobacteria	84	206	189	175	Betaproteobacteria	24	255	225	143	Betaproteobacteria	2	20	32	9
Calditrichaeota	0	0	0	0	Calditrichaeota	0	0	0	0	Calditrichaeota	0	0	0	0	Calditrichaeota	0	0	0	0	Calditrichaeota	0	0	0	0	Calditrichaeota	0	0	0	0	Calditrichaeota	0	0	0	0	Calditrichaeota	0	0	0	0
Cand div Zixibacteria	0	0	0	0	Cand div Zixibacteria	0	0	0	0	Cand div Zixibacteria	0	0	0	0	Cand div Zixibacteria	0	0	0	0	Cand div Zixibacteria	0	0	0	0	cand div Zixibacteria	0	0	0	0	Cand div Zixibacteria	0	0	0	0	Cand div Zixibacteria	0	0	0	0
Candidatus Hydrogenedentes	0	0	0	0	Candidatus Hydrogenedentes	0	0	0	0	Candidatus Hydrogenedentes	0	0	0	0	Candidatus Hydrogenedentes	0	0	0	0	Candidatus Hydrogenedentes	0	0	0	0	Candidatus Hydrogenedentes	4	0	0	0	Candidatus Hydrogenedentes	0	0	0	0	Candidatus Hydrogenedentes	0	0	0	0
Candidatus Mlainabacteria	0	0	0	0	Candidatus Mlainabacteria	0	0	0	0	Candidatus Mlainabacteria	0	0	0	0	Candidatus Mlainabacteria	0	0	0	0	Candidatus Mlainabacteria	0	0	0	0	Candidatus Mlainabacteria	0	0	0	0	Candidatus Mlainabacteria	0	0	0	0	Candidatus Mlainabacteria	0	0	0	0
Candidatus Rokubacteria	0	0	0	0	Candidatus Rokubacteria	0	0	0	0	Candidatus Rokubacteria	10	0	0	0	Candidatus Rokubacteria	0	0	0	0	Candidatus Rokubacteria	0	0	0	0	Candidatus Rokubacteria	0	0	0	0	Candidatus Rokubacteria	0	0	0	0	Candidatus Rokubacteria	0	0	0	0
Chlamydiae	0	0	0	0	Chlamydiae	0	0	0	0	Chlamydiae	0	0	0	0	Chlamydiae	0	0	0	0	Chlamydiae	0	0	0	0	Chlamydiae	0	0	0	0	Chlamydiae	0	0	0	0	Chlamydiae	0	0	0	0
Chloroflexi	7	0	0	0	Chloroflexi	0	0	0	0	Chloroflexi	51	10	50	24	Chloroflexi	1	0	0	0	Chloroflexi	0	0	0	0	Chloroflexi	9	0	0	0	Chloroflexi	0	0	0	0	Chloroflexi	3	8	18	3
Cyanobacteria	0	4	2	3	Cyanobacteria	0	0	0	0	Cyanobacteria	0	0	0	0	Cyanobacteria	0	0	0	0	Cyanobacteria	0	0	0	0	Cyanobacteria	0	0	0	0	Cyanobacteria	0	0	0	0	Cyanobacteria	0	0	0	0
Deferibacteres	0	0	0	0	Deferibacteres	0	0	0	0	Deferibacteres	0	0	0	0	Deferibacteres	0	0	0	0	Deferibacteres	0	0	0	0	Deferibacteres	0	0	0	0	Deferibacteres	0	0	0	0	Deferibacteres	0	0	0	0
Deinococcus-Thermus	13	0	0	0	Deinococcus-Thermus	0	0	0	0	Deinococcus-Thermus	0	0	0	0	Deinococcus-Thermus	0	0	0	0	Deinococcus-Thermus	1	0	0	0	Deinococcus-Thermus	0	0	0	0	Deinococcus-Thermus	0	0	0	0	Deinococcus-Thermus	1	0	0	0
Deltaproteobacteria	0	27	44	29	Deltaproteobacteria	5	11	0	0	Deltaproteobacteria	4	0	0	0	Deltaproteobacteria	0	0	0	0	Deltaproteobacteria	4	2	3	2	Deltaproteobacteria	31	11	31	11	Deltaproteobacteria	1	0	0	0	Deltaproteobacteria	5	5	5	2
Elusimicrobia	0	0	0	0	Elusimicrobia	0	0	0	0	Elusimicrobia	0	0	0	0	Elusimicrobia	0	0	0	0	Epsilonproteobacteria	0	0	0	0	Elusimicrobia	5	0	0	0	Elusimicrobia	0	0	0	0	Elusimicrobia	0	0	0	0
Epsilonproteobacteria	0	0	0	0	Epsilonproteobacteria	0	0	0	0	Epsilonproteobacteria	0	0	0	0	Epsilonproteobacteria	0	0	0	0	Firmicutes	0	0	0	0	Epsilonproteobacteria	0	0	0	0	Epsilonproteobacteria	0	0	0	0	Epsilonproteobacteria	0	8	6	3
Firmicutes	6	3	0	0	Firmicutes	22	0	0	0	Firmicutes	9	13	24	53	Firmicutes	0	0	0	0	Gammaproteobacteria	6	21	21	17	Firmicutes	7	5	19	5	Firmicutes	1	0	0	0	Firmicutes	1	20	28	12
Gammaproteobacteria	94	17	202	317	Gammaproteobacteria	165	417	1514	1927	Gammaproteobacteria	54	580	228	260	Gammaproteobacteria	5	10	9	7	Gemmatimonadetes	0	0	0	0	Gammaproteobacteria	98	405	178	151	Gammaproteobacteria	10	22	11	22	Gammaproteobacteria	0	0	3	0
Gemmatimonadetes	10	0	0	0	Gemmatimonadetes	0	0	0	0	Gemmatimonadetes	10	7	0	0	Gemmatimonadetes	0	0	0	0	Hydrogenophilalia	0	0	0	0	Gemmatimonadetes	0	0	0	0	Gemmatimonadetes	0	0	0	0	Gemmatimonadetes	4	18	14	9
Hydrogenophilalia	0	0	0	0	Hydrogenophilalia	0	0	0	0	Hydrogenophilalia	0	0	0	0	Hydrogenophilalia	1	1	0	0	Ignavibacteriae	0	0	0	0	Hydrogenophilalia	0	0	0	0	Hydrogenophilalia	0	0	0	0	Hydrogenophilalia	0	0	0	0
Ignavibacteriae	0	0	0	0	Ignavibacteriae	0	0	0	0	Ignavibacteriae	0	0	0	0	Ignavibacteriae	0	0	0	0	Nitrospirae	1	0	0	0	Ignavibacteriae	5	0	0	0	Ignavibacteriae	0	0	0	0	Ignavibacteriae	4	7	13	12
Nitrospirae	0	0	0	0	Nitrospirae	19	67	124	76	Nitrospirae	5	0	0	0	Nitrospirae	0	0	0	0	Planctomycetes	0	0	0	0	Nitrospirae	0	0	0	0	Nitrospirae	0	0	0	0	Nitrospirae	0	0	0	0
Planctomycetes	12	0	0	0	Planctomycetes	0	0	0	0	Planctomycetes	0	0	0	0	Planctomycetes	0	0	0	0	Spirochaetes	1	1	1	0	Planctomycetes	31	10	19	10	Planctomycetes	0	0	0	0	Planctomycetes	1	0	4	2
Spirochaetes	0	0	0	0	Spirochaetes	0	0	0	0	Spirochaetes	0	0	0	0	Spirochaetes	0	0	0	0	Thaumarchaeota	0	0	0	0	Spirochaetes	0	0	0	0	Spirochaetes	0	0	0	0	Spirochaetes	0	0	0	0
Unclassified	36	8	15	13	Unclassified	410	24	34	33	Unclassified	0	284	193	222	Unclassified	1	3	2	1	Unclassified	15	4	4	8	Unclassified	111	102	94	67	Unclassified	4	23	21	16	Unclassified	83	19	43	21
Verrucomicrobia	0	0	0	0	Verrucomicrobia	0	0	0	0	Verrucomicrobia	17	7	9	10	Verrucomicrobia	0	0	0	0	Verrucomicrobia	4	0	0	0	Verrucomicrobia	0	0	0	0	Verrucomicrobia	1	0	0	0	Verrucomicrobia	14	4	8	6
